# Supplementary material
Source: MDPI journal article supplement (https://www.mdpi.com/2071-1050/12/10/4298)
Supplement: s1 [file s1]

## **Interview Guideline**

Hello, my name is \_\_\_\_\_, I am a researcher at the University of Chile and together with the Municipality of Valparaíso we are conducting a study about fires. Our objective is to generate prevention actions from this information. In this context, we will be interested to know your opinion and experience on the subject. Everything you tell us will be confidential. This interview will last approximately one hour and will be recorded to be transcribed and worked on.

We thank you in advance for your cooperation.

### **1. Caracterización Sociodemográfica**

- Age, Gender
- Locality
- Time living in Valparaiso
- Time living in locality
- Experience with fires
- Experiencie with evacuation
- Type of housing (leased, own, close, take, etc.)

### **2. Perceptions of Fires**

General question: Could you tell us about your experience with fires here in Valparaíso, please?

#### *2.1. Fire triggers*

In your opinion:

- What are the main causes of fires that occur here?
- Do you think this has changed over time, for example, since you came to live here until now?
- In general, how has this place changed since you live here?

#### ***Interviewer Notes:***

- ❖ *Explore anthropogenic causes and propagation factors at different levels (eg, individual, community, institutional, political, environmental, economic, etc.).*
- ❖ *Investigate motivations attributed to people, organizations or others that cause fires.*
- ❖ *Dig deeper into the causes of fires, trying to differentiate causes of threats, if possible.*
- ❖ *Explore changes in land use (e.g., intakes, plantations, landfills, etc.); changes in livelihoods (e.g., sources of employment and subsistence); changes in lifestyles; and how all the above can be related to fires.*
- ❖ *Explore role of climate change if not mentioned.*

#### *2.2. Perception of risk*

In your opinion or experience:

- What are the main impacts of fires?

- Who is most affected by fires in your community? Who is most affected by the fires in Valparaíso?
- Do you feel prepared to face a fire, why? How do you think this community and Valparaíso in general is prepared for the fires?
- How important is it that you can do to prevent a fire or lessen its impacts?
- What responsibilities do different actors have for fires?

**Interviewer Notes:**

- ❖ Investigate types of damage (e.g., infrastructure, housing, psychological, economic, environmental, etc.); changes in lifestyles following fires.
- ❖ Explore responsibilities causing, preventing, and responding to fires.

### **3. Actions (prevention, preparedness, and response)**

#### *3.1. Individual and community actions*

- In your opinion, what are the most effective actions that you and / or your neighbors take to prevent fires? And what actions do you think have not worked?
- Why -motivations- are these actions carried out, and not others?
- What are the main difficulties that you and / or your community must carry out prevention actions? What things make it easier for you and / or your community to carry out prevention actions?

#### *3.2. Institutional actions*

- What are the most effective actions that the municipality and / or other institutions or organizations take to prevent fires? What actions do you think have not worked?
- Why -motivations- are these actions carried out, and not others?
- What are the main difficulties that the municipality or other institutions or organizations have in carrying out prevention actions? What things facilitate the municipality and / or other institutions or organizations to carry out prevention actions?
- And in general, what actions do you think remain to be done?

**Interviewer Notes:**

- ❖ Motivation for action: why do they do what they do? What are the reasons for the actions: just preventing fires or other things like taking care of nature or preventing crime? Why do you think each actor does what he does and not something else?
- ❖ Inquire perceptions of the actions of different actors such as Community, Municipality, Fire, Social organizations, others.
- ❖ Enfatizar y sistematizar recursos comunitarios existentes.
- ❖ Identificar barreras psicológicas, sociales, culturales o institucionales para implementar acciones de prevención.
- ❖ Emphasize and systematize existing community resources.
- ❖ Identify psychological, social, cultural, or institutional barriers to implement prevention actions.

#### 4. Social Interactions

- How do you evaluate your and your neighbors' participation in fire prevention? And in general, how do you evaluate the participation of you and your neighbors in other issues that affect your community? In your opinion, how do you think community participation should be on this issue?
- How is the relationship of your community with the Municipality and other institutions / organizations such as Firefighters, NGOs, etc.?
- What role do you think Universities have in fire prevention in your community and in Valparaíso?

#### **Interviewer Notes:**

- ❖ *Participation: investigate preferences and prevalence of top-down, bottom-up, polycentric approaches, etc.; look for explanations*
- ❖ *How is and how is communication evaluated in the community? How could such communication contribute, as a resource, in a fire prevention plan?*
- ❖ *Relationship of the community with other actors: Investigate how communication between the community and other actors is evaluated and how it is evaluated (types of information, main channels, forms, etc.)*

#### **Sampling criteria.**

| Criteria                     |                     |                 |
|------------------------------|---------------------|-----------------|
| Locality                     | Las Palmas          | Huilmo          |
| Time living in the territory | Ancient inhabitants | New inhabitants |
| Time living in the locality  | Ancient inhabitants | New inhabitants |
| Gender                       | Female              | Male            |
